# Supplementary material
Source: Springer Nature journal article supplement (https://www.springermedizin.de/resource/supplementary/12876_2011_711_MOESM1_ESM.pdf/9437626)
Supplement: MOESM1 [file 9437626]

Medicare Beneficiaries  
eligible for study,  
n=3,276

Has a doctor or other health professional ever given [you] a home testing kit to test for blood in the stool? (Given Home Fecal Occult Blood Test [FOBT]), n=3,276

Ever had a colonoscopy or sigmoidoscopy, n=3,276

NO

‡YES

NO

‡YES

Ever heard of colonoscopy, n=1,179

Ever heard of home FOBT kit, n=1,609

Sent in most recent one, n=1,667

‡YES  
Did doctor recommend colonoscopy, n=935\*

YES

When was most recent one?  
• <1 year  
• 1-2 years  
• 2-3 years  
• 3-5 years  
• >5 years (n=2,097)

When was most recent one?  
• <1 year  
• 1-2 years  
• 2-3 years  
• 3-5 years  
• >5 years (n=1,574)

‡YES

‡YES
